# Supplementary material for: Time-sensitive prognostic performance of an afterload-integrated diastolic index in heart failure with preserved ejection fraction: a prospective multicentre observational study
Source: HighWire-hosted journal article supplement (doi:10.1136/bmjopen-2021-059614), 2022-08-01
Supplement: bmjopen-2021-059614supp001_data_supplement.pdf [file bmjopen-2021-059614supp001_data_supplement.pdf]

**Suppl. table 1. Clinical characteristics in patients with low and high Ed/Ea before discharge and 1 year after discharge: cutoff point of Ed/Ea for all-cause mortality**

|                                | Ed/Ea: Before discharge           |                              | <i>p-value</i><br>( <i>low vs. high</i> ) | Ed/Ea: 1 Year after               |                                 | <i>p-value</i><br>( <i>low vs. high</i> ) |
|--------------------------------|-----------------------------------|------------------------------|-------------------------------------------|-----------------------------------|---------------------------------|-------------------------------------------|
|                                | low ( $\leq$<br>0.132)<br>n = 398 | high ( $>0.132$ )<br>n = 261 |                                           | low ( $\leq$<br>0.132)<br>n = 229 | high<br>( $>0.132$ )<br>n = 115 |                                           |
| All-cause mortality, n (%)     | 26 (7)                            | 45 (17)                      | <i>&lt;0.001</i>                          | 10 (4)                            | 14 (12)                         | <i>0.007</i>                              |
| Age, years                     | 80 $\pm$ 9                        | 83 $\pm$ 9                   | <i>0.001</i>                              | 80 $\pm$ 9                        | 83 $\pm$ 7                      | <i>0.001</i>                              |
| Male sex, n (%)                | 204 (51)                          | 92 (35)                      | <i>&lt;0.001</i>                          | 110 (48)                          | 47 (41)                         | <i>0.126</i>                              |
| Systolic blood pressure, mmHg  | 122 $\pm$ 19                      | 120 $\pm$ 19                 | <i>0.238</i>                              | 132 $\pm$ 21                      | 128 $\pm$ 22                    | <i>0.082</i>                              |
| Diastolic blood pressure, mmHg | 66 $\pm$ 12                       | 64 $\pm$ 11                  | <i>0.017</i>                              | 70 $\pm$ 13                       | 65 $\pm$ 11                     | <i>0.003</i>                              |
| Heart rate, bpm                | 70 $\pm$ 15                       | 70 $\pm$ 15                  | <i>0.731</i>                              | 70 $\pm$ 15                       | 68 $\pm$ 13                     | <i>0.157</i>                              |
| Atrial fibrillation, n (%)     | 178 (45)                          | 112 (43)                     | <i>0.646</i>                              | 106 (46)                          | 46 (40)                         | <i>0.160</i>                              |
| Coronary artery disease, n (%) | 64 (16)                           | 58 (22)                      | <i>0.029</i>                              | 32 (14)                           | 31 (27)                         | <i>0.002</i>                              |
| Diabetes mellitus, n (%)       | 134 (34)                          | 99 (38)                      | <i>0.150</i>                              | 81 (35)                           | 45 (39)                         | <i>0.286</i>                              |
| Dyslipidemia, n (%)            | 155 (39)                          | 115 (44)                     | <i>0.110</i>                              | 97 (42)                           | 59 (51)                         | <i>0.072</i>                              |

|                                  |                 |                 |              |                 |                 |              |
|----------------------------------|-----------------|-----------------|--------------|-----------------|-----------------|--------------|
| <b>Hypertension, n (%)</b>       | <b>330 (83)</b> | <b>235 (90)</b> | <b>0.007</b> | <b>199 (87)</b> | <b>101 (88)</b> | <b>0.471</b> |
| <i>Laboratory data</i>           |                 |                 |              |                 |                 |              |
| Albumin, g/dL                    | 3.4 ± 0.5       | 3.4 ± 0.5       | 0.934        | 3.9 ± 0.4       | 3.8 ± 0.5       | 0.022        |
| eGFR, mL/min/1.73 m <sup>2</sup> | 45 ± 19         | 41 ± 19         | 0.009        | 44 ± 19         | 35 ± 18         | <0.001       |
| Hemoglobin, g/dL                 | 11.5 ± 2.0      | 11.2 ± 2.0      | 0.057        | 12.0 ± 1.7      | 11.5 ± 1.9      | 0.007        |
| NT-proBNP, pg/mL                 | 1957 ± 3634     | 3483 ± 8136     | 0.001        | 1755 ± 2921     | 4608 ± 8051     | <0.001       |
| <i>Echocardiographic data</i>    |                 |                 |              |                 |                 |              |
| LAD, mm                          | 43 ± 9          | 45 ± 8          | 0.004        | 44 ± 9          | 46 ± 7          | 0.033        |
| LAVI, mL/m <sup>2</sup>          | 52 ± 25         | 56 ± 24         | 0.045        | 53 ± 27         | 55 ± 20         | 0.598        |
| SV/LAV                           | 0.74 ± 0.36     | 0.66 ± 0.33     | 0.015        | 0.72 ± 0.33     | 0.63 ± 0.31     | 0.038        |
| SV, mL                           | 50 ± 19         | 50 ± 21         | 0.999        | 50 ± 18         | 47 ± 18         | 0.275        |
| LVESV, mL                        | 34 ± 18         | 32 ± 17         | 0.091        | 33 ± 17         | 29 ± 12         | 0.011        |
| LVEDV, mL                        | 83 ± 34         | 81 ± 35         | 0.385        | 83 ± 30         | 76 ± 28         | 0.043        |
| LVEF, %                          | 60 ± 8          | 61 ± 8          | 0.105        | 62 ± 8          | 62 ± 9          | 0.906        |
| LVMI, g/m <sup>2</sup>           | 104 ± 32        | 110 ± 36        | 0.017        | 99 ± 31         | 107 ± 31        | 0.013        |
| E, m/sec                         | 0.72 ± 0.22     | 1.02 ± 0.31     | <0.001       | 0.75 ± 0.24     | 1.01 ± 0.31     | <0.001       |
| mean e', cm/sec                  | 7.1 ± 2.1       | 5.5 ± 1.7       | <0.001       | 6.8 ± 2.2       | 6.0 ± 1.9       | <0.001       |
| DcT, sec                         | 0.21 ± 0.06     | 0.23 ± 0.08     | 0.002        | 0.21 ± 0.06     | 0.22 ± 0.09     | 0.378        |
| <i>Medications</i>               |                 |                 |              |                 |                 |              |
| Beta-blockers, %                 | 52              | 58              | 0.131        | 50              | 59              | 0.104        |

|                                    |           |           |              |           |           |              |
|------------------------------------|-----------|-----------|--------------|-----------|-----------|--------------|
| <b>Calcium-channel blockers, %</b> | <b>50</b> | <b>54</b> | <b>0.296</b> | <b>47</b> | <b>54</b> | <b>0.218</b> |
| <b>Diuretics, %</b>                | <b>81</b> | <b>86</b> | <b>0.138</b> | <b>77</b> | <b>85</b> | <b>0.083</b> |
| <b>RAAS-I, %</b>                   | <b>73</b> | <b>75</b> | <b>0.413</b> | <b>71</b> | <b>67</b> | <b>0.391</b> |
| <b>Statins, %</b>                  | <b>31</b> | <b>35</b> | <b>0.258</b> | <b>34</b> | <b>39</b> | <b>0.318</b> |

All-cause mortality was evaluated for 2 years per year.

Values are mean  $\pm$  standard deviation or number (%).

DcT, deceleration time of E wave;

Ed, diastolic elastance; Ea, arterial elastance; eGFR, estimated glomerular filtration rate;

NT-proBNP, N-terminal pro-brain natriuretic peptide; LAD, left atrial diameter;

LAVI, left atrial volume index; SV, stroke volume; LAV, left atrial volume;

LVEF, left ventricular ejection fraction; LVESV, left ventricular end-systolic volume;

LVEDV, left ventricular end-diastolic volume; LVMI, left ventricular mass index;

RAAS-I, renin-angiotensin-aldosterone system inhibitors
