# Supplementary material for: Time-sensitive prognostic performance of an afterload-integrated diastolic index in heart failure with preserved ejection fraction: a prospective multicentre observational study
Source: HighWire-hosted journal article supplement (doi:10.1136/bmjopen-2021-059614), 2022-08-01
Supplement: bmjopen-2021-059614supp002_data_supplement.pdf [file bmjopen-2021-059614supp002_data_supplement.pdf]

**Suppl. table 2. Clinical characteristics in patients with low and high Ed/Ea before discharge and at 1 year after discharge: cutoff point of Ed/Ea for all-cause mortality and/or re-admission for heart failure**

|                                                                    | Ed/Ea: Before discharge |                    | <i>p</i> -value<br>(low vs.<br>high) | Ed/Ea: 1 Year after  |                    | <i>p</i> -value<br>(low vs.<br>high) |
|--------------------------------------------------------------------|-------------------------|--------------------|--------------------------------------|----------------------|--------------------|--------------------------------------|
|                                                                    | low ( $\leq 0.097$ )    | high ( $> 0.097$ ) |                                      | low ( $\leq 0.097$ ) | high ( $> 0.097$ ) |                                      |
|                                                                    | n = 216                 | n = 443            |                                      | n = 116              | n = 171            |                                      |
| All-cause mortality and/or hospitalization of heart failure, n (%) | 38 (18)                 | 144 (33)           | $< 0.001$                            | 12 (10)              | 31 (18)            | 0.050                                |
| Age, years                                                         | 79 $\pm$ 9              | 82 $\pm$ 9         | $< 0.001$                            | 78 $\pm$ 11          | 81 $\pm$ 8         | $< 0.001$                            |
| Male sex, n (%)                                                    | 124 (57)                | 172 (39)           | $< 0.001$                            | 67 (58)              | 67 (39)            | 0.001                                |
| Systolic blood pressure, mmHg                                      | 123 $\pm$ 19            | 120 $\pm$ 19       | 0.051                                | 131 $\pm$ 17         | 127 $\pm$ 20       | 0.077                                |
| Diastolic blood pressure, mmHg                                     | 67 $\pm$ 12             | 64 $\pm$ 12        | 0.004                                | 72 $\pm$ 13          | 66 $\pm$ 12        | $< 0.001$                            |
| Heart rate, bpm                                                    | 69 $\pm$ 15             | 70 $\pm$ 15        | 0.561                                | 77 $\pm$ 13          | 65 $\pm$ 16        | 0.407                                |
| Atrial fibrillation, n (%)                                         | 99 (46)                 | 191 (43)           | 0.509                                | 55 (47)              | 74 (43)            | 0.284                                |

|                                        |                    |                    |                  |                    |                    |                  |
|----------------------------------------|--------------------|--------------------|------------------|--------------------|--------------------|------------------|
| <b>Coronary artery disease, n (%)</b>  | <b>32 (15)</b>     | <b>90 (20)</b>     | <b>0.054</b>     | <b>12 (10)</b>     | <b>37 (22)</b>     | <b>0.009</b>     |
| <b>Diabetes mellitus, n (%)</b>        | <b>74 (34)</b>     | <b>159 (36)</b>    | <b>0.372</b>     | <b>37 (32)</b>     | <b>65 (38)</b>     | <b>0.174</b>     |
| <b>Dyslipidemia, n (%)</b>             | <b>88 (41)</b>     | <b>182 (41)</b>    | <b>0.500</b>     | <b>46 (40)</b>     | <b>79 (46)</b>     | <b>0.164</b>     |
| <b>Hypertension, n (%)</b>             | <b>176 (81)</b>    | <b>389 (88)</b>    | <b>0.019</b>     | <b>99 (85)</b>     | <b>151 (88)</b>    | <b>0.289</b>     |
| <b><i>Laboratory data</i></b>          |                    |                    |                  |                    |                    |                  |
| <b>Albumin, g/dL</b>                   | <b>3.4 ± 0.4</b>   | <b>3.4 ± 0.5</b>   | <b>0.845</b>     | <b>4.0 ± 0.4</b>   | <b>3.9 ± 0.5</b>   | <b>0.036</b>     |
| <b>eGFR, mL/min/1.73 m<sup>2</sup></b> | <b>46 ± 20</b>     | <b>41 ± 19</b>     | <b>0.004</b>     | <b>48 ± 19</b>     | <b>39 ± 19</b>     | <b>&lt;0.001</b> |
| <b>Hemoglobin, g/dL</b>                | <b>11.8 ± 2.0</b>  | <b>11.2 ± 2.0</b>  | <b>&lt;0.001</b> | <b>12.3 ± 1.6</b>  | <b>11.6 ± 1.8</b>  | <b>&lt;0.001</b> |
| <b>NT-proBNP, pg/mL</b>                | <b>1948 ± 3877</b> | <b>2859 ± 6618</b> | <b>0.074</b>     | <b>1524 ± 2534</b> | <b>2556 ± 4359</b> | <b>0.035</b>     |
| <b><i>Echocardiographic data</i></b>   |                    |                    |                  |                    |                    |                  |
| <b>LAD, mm</b>                         | <b>43 ± 9</b>      | <b>44 ± 8</b>      | <b>0.032</b>     | <b>43 ± 9</b>      | <b>45 ± 8</b>      | <b>0.054</b>     |
| <b>LAVI, mL/m<sup>2</sup></b>          | <b>51 ± 26</b>     | <b>55 ± 24</b>     | <b>0.034</b>     | <b>52 ± 29</b>     | <b>52 ± 24</b>     | <b>0.925</b>     |
| <b>SV/LAV</b>                          | <b>0.76 ± 0.38</b> | <b>0.69 ± 0.34</b> | <b>0.021</b>     | <b>0.72 ± 0.33</b> | <b>0.69 ± 0.35</b> | <b>0.553</b>     |
| <b>SV, mL</b>                          | <b>50 ± 20</b>     | <b>49 ± 20</b>     | <b>0.416</b>     | <b>48 ± 17</b>     | <b>47 ± 13</b>     | <b>0.819</b>     |

|                              |                    |                    |                  |                    |                    |                  |
|------------------------------|--------------------|--------------------|------------------|--------------------|--------------------|------------------|
| <b>LVESV, mL</b>             | <b>36 ± 19</b>     | <b>32 ± 16</b>     | <b>0.008</b>     | <b>30 ± 17</b>     | <b>29 ± 13</b>     | <b>0.472</b>     |
| <b>LVEDV, mL</b>             | <b>86 ± 36</b>     | <b>80 ± 33</b>     | <b>0.061</b>     | <b>78 ± 30</b>     | <b>76 ± 27</b>     | <b>0.598</b>     |
| <b>LVEF, %</b>               | <b>60 ± 8</b>      | <b>61 ± 8</b>      | <b>0.018</b>     | <b>62 ± 8</b>      | <b>63 ± 8</b>      | <b>0.592</b>     |
| <b>LVMI, g/m<sup>2</sup></b> | <b>104 ± 33</b>    | <b>108 ± 34</b>    | <b>0.160</b>     | <b>97 ± 31</b>     | <b>103 ± 30</b>    | <b>0.109</b>     |
| <b>E, m/sec</b>              | <b>0.66 ± 0.20</b> | <b>0.93 ± 0.30</b> | <b>&lt;0.001</b> | <b>0.71 ± 0.19</b> | <b>0.95 ± 0.29</b> | <b>&lt;0.001</b> |
| <b>mean e', cm/sec</b>       | <b>7.5 ± 2.3</b>   | <b>6.0 ± 1.9</b>   | <b>&lt;0.001</b> | <b>7.7 ± 1.8</b>   | <b>5.9 ± 1.6</b>   | <b>&lt;0.001</b> |
| <b>DcT, sec</b>              | <b>0.20 ± 0.06</b> | <b>0.22 ± 0.07</b> | <b>0.026</b>     | <b>0.23 ± 0.07</b> | <b>0.23 ± 0.08</b> | <b>0.944</b>     |

*Medications*

|                                    |           |           |              |           |           |              |
|------------------------------------|-----------|-----------|--------------|-----------|-----------|--------------|
| <b>Beta-blockers, %</b>            | <b>52</b> | <b>56</b> | <b>0.317</b> | <b>47</b> | <b>54</b> | <b>0.188</b> |
| <b>Calcium-channel blockers, %</b> | <b>50</b> | <b>53</b> | <b>0.607</b> | <b>47</b> | <b>51</b> | <b>0.471</b> |
| <b>Diuretics, %</b>                | <b>84</b> | <b>83</b> | <b>0.759</b> | <b>74</b> | <b>80</b> | <b>0.224</b> |
| <b>RAAS-I, %</b>                   | <b>70</b> | <b>75</b> | <b>0.168</b> | <b>72</b> | <b>69</b> | <b>0.627</b> |
| <b>Statins, %</b>                  | <b>33</b> | <b>32</b> | <b>0.833</b> | <b>33</b> | <b>38</b> | <b>0.391</b> |

All-cause mortality and/or re-admission for heart failure was evaluated for 2 years per year.

Values are mean ± standard deviation or number (%).

DcT, deceleration time of E wave;

Ed, diastolic elastance; Ea, arterial elastance; eGFR, estimated

**glomerular filtration rate; NT-proBNP, N-terminal pro-brain natriuretic peptide; LAD, left atrial diameter; LAVI, left atrial volume index; SV, stroke volume; LAV, left atrial volume; LVEF, left ventricular ejection fraction; LVESV, left ventricular end-systolic volume; LVEDV, left ventricular end-diastolic volume; LVMI, left ventricular mass index; RAAS-I, renin-angiotensin-aldosterone system inhibitors**
