# Supplementary material for: Time-sensitive prognostic performance of an afterload-integrated diastolic index in heart failure with preserved ejection fraction: a prospective multicentre observational study
Source: HighWire-hosted journal article supplement (doi:10.1136/bmjopen-2021-059614), 2022-08-01
Supplement: bmjopen-2021-059614supp003_data_supplement.pdf [file bmjopen-2021-059614supp003_data_supplement.pdf]

**Suppl. table 3. Differences in clinical characteristics between the patients with years 0-1 analysis and years 1-2 analysis for all-cause mortality**

|                                       | Years 0-1<br>n = 659 | Years 1-2<br>n = 344 | <i>p</i> -value |
|---------------------------------------|----------------------|----------------------|-----------------|
| All-cause mortality for 1 year, n (%) | 71 (11)              | 24 (7)               | 0.051           |
| Age, years                            | 81 ± 9               | 81 ± 9               | 0.780           |
| Male sex, n (%)                       | 296 (45)             | 157 (46)             | 0.827           |
| Systolic blood pressure, mmHg         | 121 ± 19             | 131 ± 21             | <0.001          |
| Diastolic blood pressure, mmHg        | 65 ± 12              | 68 ± 12              | <0.001          |
| Heart rate, bpm                       | 70 ± 15              | 70 ± 14              | 0.619           |
| Atrial fibrillation, n (%)            | 290 (44)             | 152 (44)             | 0.956           |
| Coronary artery disease, n (%)        | 122 (19)             | 63 (18)              | 0.938           |
| Diabetes mellitus, n (%)              | 233 (35)             | 126 (37)             | 0.690           |
| Dyslipidemia, n (%)                   | 270 (41)             | 156 (45)             | 0.183           |
| Hypertension, n (%)                   | 565 (86)             | 300 (87)             | 0.520           |
| <i>Echocardiographic data</i>         |                      |                      |                 |
| LAD, mm                               | 44 ± 8               | 44 ± 8               | 0.452           |
| LAVI, mL/m <sup>2</sup>               | 54 ± 25              | 53 ± 25              | 0.949           |
| SV, mL                                | 50 ± 20              | 48 ± 17              | 0.309           |
| LVESV, mL                             | 33 ± 17              | 30 ± 16              | 0.083           |
| LVEDV, mL                             | 82 ± 34              | 78 ± 29              | 0.024           |
| LVEF, %                               | 61 ± 8               | 62 ± 8               | 0.013           |
| LVMI, g/m <sup>2</sup>                | 102 ± 32             | 102 ± 31             | 0.840           |
| E, m/sec                              | 0.84 ± 0.30          | 0.86 ± 0.29          | 0.233           |
| mean e', cm/sec                       | 6.5 ± 2.1            | 6.6 ± 1.9            | 0.501           |
| DcT, sec                              | 0.21 ± 0.07          | 0.23 ± 0.07          | 0.030           |
| E/e'                                  | 13.8 ± 5.7           | 14.0 ± 5.9           | 0.677           |
| Ed/Ea                                 | 0.130 ± 0.056        | 0.121 ± 0.051        | 0.011           |

Values are presented as means ± standard deviations

or numbers (%).

**DcT, deceleration time of E wave; Ea, arterial elastance;**

**Ed, diastolic elastance; LAD, left atrial diameter;**

**LAVI, left atrial volume index; SV, stroke volume;**

**LAV, left atrial volume; LVEF, left ventricular**

**ejection fraction; LVESV, left ventricular end-systolic**

**volume; LVEDV, left ventricular end-diastolic volume;**

**LVMI, left ventricular mass index**
